# Supplementary material for: Sex‐Related Differences in Patients at High Bleeding Risk Undergoing Percutaneous Coronary Intervention: A Patient‐Level Pooled Analysis From 4 Postapproval Studies
Source: PubMed Central journal article supplement — J Am Heart Assoc. 2020 Mar 30;9(7):e014611. doi: 10.1161/JAHA.119.014611 (PMC7428610; doi:10.1161/jaha.119.014611), 2020-03-30
Supplement: JAH3-9-e014611-s001.pdf [file JAH3-9-e014611-s001.pdf]

# **Supplemental Material**

**Table S1. List of adjudicated endpoints in included registries.**

|                                                                                                                                                                                                                      |
|----------------------------------------------------------------------------------------------------------------------------------------------------------------------------------------------------------------------|
| <b>XV Japan</b><br>Stent thrombosis, cardiac death(s), suspected MI(s), and repeat TLR(s) and TVR(s) up to 3 years.                                                                                                  |
| <b>XV USA</b><br>Death, MI, revascularization, and ST.<br>Major bleeding complications will be adjudicated through 2-year follow-up.                                                                                 |
| <b>XV India</b><br>ARC definitions for the following: death, MI, revascularization, and stent thrombosis.<br>Major bleeding complications and unanticipated adverse device effects (UADEs) will also be adjudicated. |
| <b>XV China</b><br>Stent thrombosis, cardiac death(s), suspected MI(s), and repeat revascularization.                                                                                                                |

MI: myocardial infarction; TLR: target lesion revascularization; TVR: target vessel revascularization; ST: stent thrombosis; ARC: Academic Research Consortium.

**Table S2. Comparison of DAPT rates between male and female HBR patients.**

| <b>Time</b> | <b>Female HBR<br/>(n = 821)</b> | <b>Male HBR<br/>(n = 1,576)</b> | <b>p-value</b> |
|-------------|---------------------------------|---------------------------------|----------------|
| 1 year      | 75.4%                           | 77.3%                           | 0.30           |
| 2 years     | 57.7%                           | 57.7%                           | >0.999         |
| 3 years     | 49.0%                           | 49.3%                           | 0.88           |
| 4 years     | 38.7%                           | 37.3%                           | 0.53           |

DAPT: dual antiplatelet therapy; HBR: high bleeding risk.

**Table S3. Comparison of DAPT rates between male and female Non-HBR patients.**

| <b>Time</b> | <b>Female Non-HBR<br/>(n = 2,011)</b> | <b>Male Non-HBR<br/>(n = 6,094)</b> | <b>p-value</b> |
|-------------|---------------------------------------|-------------------------------------|----------------|
| 1 year      | 82.3%                                 | 85.0%                               | 0.003          |
| 2 years     | 58.4%                                 | 62.1%                               | 0.003          |
| 3 years     | 52.6%                                 | 54.8%                               | 0.09           |
| 4 years     | 44.1%                                 | 45.1%                               | 0.46           |

DAPT: dual antiplatelet therapy; HBR: high bleeding risk.

**Table S4. Sex-wise outcomes in HBR patients up to 3 years.**

|                      | 1 YEAR                  |                         | 2 YEARS                 |                         | 3 YEARS                 |                         |
|----------------------|-------------------------|-------------------------|-------------------------|-------------------------|-------------------------|-------------------------|
|                      | Female HBR<br>(n = 821) | Male HBR<br>(n = 1,576) | Female HBR<br>(n = 821) | Male HBR<br>(n = 1,576) | Female HBR<br>(n = 821) | Male HBR<br>(n = 1,576) |
| MACE                 | 5.1%                    | 4.7%                    | 7.4%                    | 7.9%                    | 9.4%                    | 9.8%                    |
| All-cause death      | 4.6%                    | 5.6%                    | 9.7%                    | 10.0%                   | 12.8%                   | 13.7%                   |
| Cardiac death        | 3.0%                    | 3.3%                    | 5.3%                    | 5.9%                    | 7.0%                    | 7.6%                    |
| Non-cardiac death    | 1.7%                    | 2.4%                    | 4.7%                    | 4.4%                    | 6.2%                    | 6.6%                    |
| MI                   | 2.6%                    | 1.6%                    | 3.0%                    | 2.4%                    | 3.5%                    | 2.9%                    |
| Definite/Probable ST | 1.0%                    | 1.2%                    | 1.0%                    | 1.3%                    | 1.2%                    | 1.5%                    |
| Major bleeding       | 7.2%                    | 3.9%                    | 10.2%                   | 5.5%                    | 10.8%                   | 5.8%                    |
| ID-TLR               | 4.3%                    | 3.4%                    | 7.5%                    | 5.0%                    | 9.7%                    | 6.1%                    |

MACE is a composite of cardiac death, MI or definite/probable ST.

HBR: high bleeding risk; HR: hazard ratio; CI: confidence interval; MACE: major adverse cardiac events; MI: myocardial infarction;

ST: stent thrombosis; ID-TLR: ischemia-driven target lesion revascularization.

**Table S5. Sex-wise and overall major bleeding rates in Non-HBR patients up to 4 years.**

|                | <b>Female Non-HBR<br/>(n = 2,011)</b> | <b>Male Non-HBR<br/>(n = 6,094)</b> | <b>Overall Non-HBR<br/>(n = 8,105)</b> |
|----------------|---------------------------------------|-------------------------------------|----------------------------------------|
| <b>1 year</b>  | 1.8%                                  | 1.5%                                | 1.6%                                   |
| <b>2 years</b> | 3.1%                                  | 2.0%                                | 2.3%                                   |
| <b>3 years</b> | 3.7%                                  | 2.5%                                | 2.9%                                   |
| <b>4 years</b> | 6.9%                                  | 4.6%                                | 5.1%                                   |

HBR: high bleeding risk

**Table S6. Sex-wise 4-year outcomes in the overall population.**

|                      | <b>Female<br/>(n = 2,832)</b> | <b>Male<br/>(n = 7,670)</b> | <b>Log-rank<br/>p-value</b> | <b>Unadjusted HR<br/>(95% CI)</b> | <b>p-value</b> | <b>Adjusted HR<br/>(95% CI)</b> | <b>p-value</b> |
|----------------------|-------------------------------|-----------------------------|-----------------------------|-----------------------------------|----------------|---------------------------------|----------------|
| MACE                 | 6.9%                          | 6.0%                        | 0.09                        | 1.16 (0.98, 1.39)                 | 0.09           | 0.90 (0.57, 1.43)               | 0.66           |
| All-cause death      | 8.6%                          | 7.5%                        | 0.09                        | 1.14 (0.98, 1.34)                 | 0.09           | 0.66 (0.42, 1.03)               | 0.07           |
| Cardiac death        | 4.0%                          | 3.7%                        | 0.47                        | 1.09 (0.87, 1.37)                 | 0.47           | 0.54 (0.27, 1.07)               | 0.08           |
| Non-cardiac death    | 4.8%                          | 4.0%                        | 0.10                        | 1.20 (0.97, 1.48)                 | 0.10           | 0.82 (0.44, 1.52)               | 0.53           |
| MI                   | 3.5%                          | 2.6%                        | 0.02                        | 1.36 (1.06, 1.75)                 | 0.02           | 1.88 (1.03, 3.42)               | 0.04           |
| Definite/Probable ST | 0.9%                          | 0.9%                        | 0.90                        | 1.03 (0.64, 1.65)                 | 0.90           | 0.91 (0.28, 2.93)               | 0.87           |
| Major bleeding       | 5.5%                          | 3.0%                        | <0.0001                     | 1.85 (1.51, 2.28)                 | <0.0001        | 0.91 (0.51, 1.64)               | 0.76           |
| ID-TLR               | 7.6%                          | 5.9%                        | 0.002                       | 1.31 (1.10, 1.55)                 | 0.002          | 1.44 (0.97, 2.16)               | 0.07           |

Adjusted hazard ratio adjusted for age  $\geq 75$  years, diabetes mellitus, smoker, hypertension, hyperlipidemia, prior MI, prior cardiac intervention, LVEF <30%, acute coronary syndrome, multivessel disease, B2/C lesion.

MACE is a composite of cardiac death, MI or definite/probable ST. HBR: high bleeding risk; HR: hazard ratio; CI: confidence interval;

MACE: major adverse cardiac events; MI: myocardial infarction; ST: stent thrombosis; ID-TLR: ischemia-driven target lesion revascularization.

**Table S7. Sex-wise 4-year outcomes in HBR patients presenting with STEMI.**

|                      | <b>Female HBR<br/>(n = 821)</b> | <b>Male HBR<br/>(n = 1,576)</b> | <b>HR (95% CI)</b> | <b>p-value</b> |
|----------------------|---------------------------------|---------------------------------|--------------------|----------------|
| MACE                 | 8.2%                            | 11.3%                           | 0.78 (0.22, 2.74)  | 0.70           |
| All-cause death      | 17.8%                           | 15.6%                           | 1.19 (0.47, 3.02)  | 0.71           |
| Cardiac death        | 8.2%                            | 10.5%                           | 0.86 (0.24, 3.04)  | 0.81           |
| Non-cardiac death    | 10.5%                           | 5.8%                            | 1.96 (0.47, 8.19)  | 0.35           |
| MI                   | 2.9%                            | 1.8%                            | 1.66 (0.15, 18.35) | 0.67           |
| Definite/Probable ST | 2.6%                            | 0.8%                            | 3.21 (0.20, 51.29) | 0.38           |
| Major bleeding       | 5.1%                            | 3.4%                            | 1.70 (0.31, 9.29)  | 0.54           |

MACE is a composite of cardiac death, MI or definite/probable ST. HBR: high bleeding risk; HR: hazard ratio; CI:

confidence interval; MACE: major adverse cardiac events; STEMI: ST-elevation myocardial infarction; ST: stent thrombosis.



**Table S8. Sex-wise 4-year outcomes in HBR patients presenting with NSTEMACS.**

|                      | <b>Female HBR<br/>(n = 821)</b> | <b>Male HBR<br/>(n = 1,576)</b> | <b>HR (95% CI)</b> | <b>p-value</b> |
|----------------------|---------------------------------|---------------------------------|--------------------|----------------|
| MACE                 | 12.7%                           | 14.7%                           | 0.88 (0.58, 1.34)  | 0.54           |
| All-cause death      | 19.6%                           | 17.8%                           | 1.11 (0.78, 1.58)  | 0.55           |
| Cardiac death        | 10.4%                           | 10.1%                           | 1.03 (0.64, 1.67)  | 0.90           |
| Non-cardiac death    | 10.2%                           | 8.5%                            | 1.22 (0.72, 2.04)  | 0.46           |
| MI                   | 4.3%                            | 4.1%                            | 1.16 (0.55, 2.44)  | 0.69           |
| Definite/Probable ST | 1.2%                            | 3.0%                            | 0.42 (0.12, 1.47)  | 0.16           |
| Major bleeding       | 13.2%                           | 7.6%                            | 1.79 (1.12, 2.86)  | 0.01           |

MACE is a composite of cardiac death, MI or definite/probable ST. HBR: high bleeding risk; HR: hazard ratio; CI:

confidence interval; MACE: major adverse cardiac events; NSTEMACS: Non-ST elevation acute coronary syndrome;

ST: stent thrombosis.

**Table S9. Bleeding risk of individual major and minor ARC-HBR criteria.**

| <b>ARC-HBR criterion</b>          | <b>HR (95% CI)</b>  | <b>p-value</b> |
|-----------------------------------|---------------------|----------------|
| <b>Major</b>                      |                     |                |
| Moderate or severe anemia         | 6.69 (4.91, 9.13)   | <0.0001        |
| Oral anticoagulation              | 3.67 (2.53, 5.34)   | <0.0001        |
| Severe or end-stage CKD           | 6.02 (3.73, 9.71)   | <0.0001        |
| Thrombocytopenia                  | 3.54 (1.44, 8.69)   | 0.003          |
| Prior spontaneous severe bleeding | 11.39 (5.00, 25.92) | <0.0001        |
| Active malignancy                 | 5.53 (0.77, 39.66)  | 0.06           |
| <b>Minor</b>                      |                     |                |
| Age $\geq$ 75 years               | 3.83 (2.96, 4.95)   | <0.0001        |
| Mild anemia                       | 3.16 (2.38, 4.21)   | <0.0001        |
| Moderate CKD                      | 3.90 (2.97, 5.11)   | <0.0001        |
| Prior moderate or severe stroke   | 3.26 (2.17, 4.88)   | <0.0001        |

ARC: Academic Research Consortium; HBR: high bleeding risk; CKD: chronic kidney disease; HR: hazard ratio; CI: confidence interval
